# Supplementary material
Source: PubMed Central journal article supplement (PMC3596261)
Supplement: NIHMS356651-supplement-1.pdf [file NIHMS356651-supplement-1.pdf]

**Supplemental Table 1. Oligonucleotides for amplification and sequencing of dog erythroid Ael cDNA.**

| OLIGO     | SEQUENCE                      | Dir | Location    | USE            | Position in RefSeq (b) | Amplicon length |
|-----------|-------------------------------|-----|-------------|----------------|------------------------|-----------------|
| dAe1.E2F  | 5'-TGCGGGTTATGCTGGGGGCTTGG-3' | For | Exon 2      | PCR-1 and Seq  | 28-50                  | 1,372 bp        |
| dAe1.E12R | 5'-TCTGGTTCTGGGTCTTTTCTCC-3'  | Rev | Exon 12     | PCR-1 and Seq  | 1420-1399              |                 |
| dAe1.E7F  | 5'-TCACAGCCTCTGCTCCCCCA-3'    | For | Exon 7      | Seq of PCR-1   | 655-674                |                 |
| dAe1.E8R2 | 5'-CTAGATGGTGAATCCTCTGTGC-3'  | Rev | Exon 8      | Seq of PCR-1   | 743-722                |                 |
| dAe1.E11F | 5'-ACGACCCTCTGCAGCGGACAG-3'   | For | Exon 11     | PCR-2 and Seq  | 1223-1243              | 1,257 bp        |
| dAe1.E18R | 5'-GTAGAGGAAGATGCCAAACAG-3'   | Rev | Exon 18     | PCR-2 and Seq  | 2499-2479              |                 |
| dAe1.F14F | 5'-ACAGCCCTCCTCTCTTGTGC-3'    | For | Exon 14     | PCR-3 and Seq  | 1825-1846              | 1,098 bp        |
| dAe1.3R1  | 5'-TCTGCTTTTCCTGGGAGAGTGG-3'  | Rev | Exon 20 (a) | PCR-3 and Seq  | 2901-2922              |                 |
| dAe1.E14R | 5'-AGGAGCTGTTCTTGAACCTGC-3'   | Rev | Exon 14     | Seq of PCR-2,3 | 1903-1883              |                 |
| dAe1.E17F | 5'-ATGCCCTGGCTCAGTGCCACCAC-3' | For | Exon 17     | Seq of PCR-3   | 2278-2300              |                 |

(a) 3'-UTR of the dog erythroid Ael mRNA.

(b) Dog erythroid Ael cDNA RefSeq NM\_001048031

**Supplemental Table 2. Oligonucleotides for amplification and sequencing of dog RhAG cDNA.**

| OLIGO     | SEQUENCE                      | Dir | Location | Use<br>(a)          | Position in<br>RefSeq (b) | Amplicon<br>Length  |
|-----------|-------------------------------|-----|----------|---------------------|---------------------------|---------------------|
| dRhAG.5F1 | 5'-GAAGCCCTCAGTGTGCCTCTG-3'   | For | 5'-UTR   | <b>PCR-1,3, Seq</b> | 1-21                      | 759 bp              |
| dRhAG.F1  | 5'-GAAGGAAGAGTCTGAGTACCAC-3'  | For | coding   | Seq                 | 633-654                   |                     |
| dRhAG.F2  | 5'-CCAACCCAAATGCTGATCATGAC-3' | For | coding   | PCR-2, Seq          | 448-470                   | 911 bp              |
| dRhAG.R1  | 5'-TATGATGGCCAGGTACTGTTCC-3'  | Rev | coding   | PCR-1, Seq          | 759-738                   | 759 bp              |
| dRhAG.R2  | 5'-TAAACCTGTGATCAGCCCTCCAG-3' | Rev | coding   | Seq                 | 1182-1160                 |                     |
| dRhAG.3R1 | 5'-GATAATGGGAAAGGAAGCCGAG-3'  | Rev | 3'-UTR   | <b>PCR-2,3, Seq</b> | 1358-1337                 | <b>1,358 bp (a)</b> |

(a) **In Bold** – oligos used for amplification and cloning.

(b) Dog RhAG cDNA RefSeq NM\_001110768

**Supplemental Table 3. Oligonucleotides for amplification and sequencing of dog Glut1 cDNA.**

| OLIGO      | SEQUENCE                       | Dir | Location   | Use           | Position in RefSeq (b) | Amplicon Length |
|------------|--------------------------------|-----|------------|---------------|------------------------|-----------------|
| dGlut1.5F1 | 5'-CACYCGGYGCTCGYGGAGCCTC-3'   | For | 5'-UTR (a) | PCR-1, Seq    | 255-276 (a)            | 859 bp          |
| dGlut1.F1  | 5'-ATGGAGCCCGGCAGCAAGAAGCTG-3' | For | coding     | PCR-1a, Seq   | 1-24                   | 822bp           |
| dGlut1.E6R | 5'-GATGAGGATGGGCTGGCGGTAGG-3'  | Rev | coding     | PCR-1,1a, Seq | 822-800                |                 |
| dGlut1.E4R | 5'-AGGCCAGCAGGTTTCATCATCAGC-3' | Rev | coding     | Seq of PCR-1  | 310-288                |                 |
| dGlut1.E6F | 5'-AGAGTCGGCAGATGATGCGGGAG-3'  | For | coding     | PCR-2, Seq    | 740-762                | 793 bp          |
| dGlut1.3R1 | 5'-TCKCATCCAGCTGCCTGTGCTCC-3'  | Rev | 3'-UTR     | PCR-2 Seq     | 1554-1532              |                 |

- (a) Dog genomic sequence AAEX02020677  
(b) Dog Glut1 cDNA RefSeq NM\_001159326
